# Supplementary material
Source: Springer Nature journal article supplement (https://www.springermedizin.de/resource/supplementary/12936_2011_1812_MOESM2_ESM.pdf/9541824)

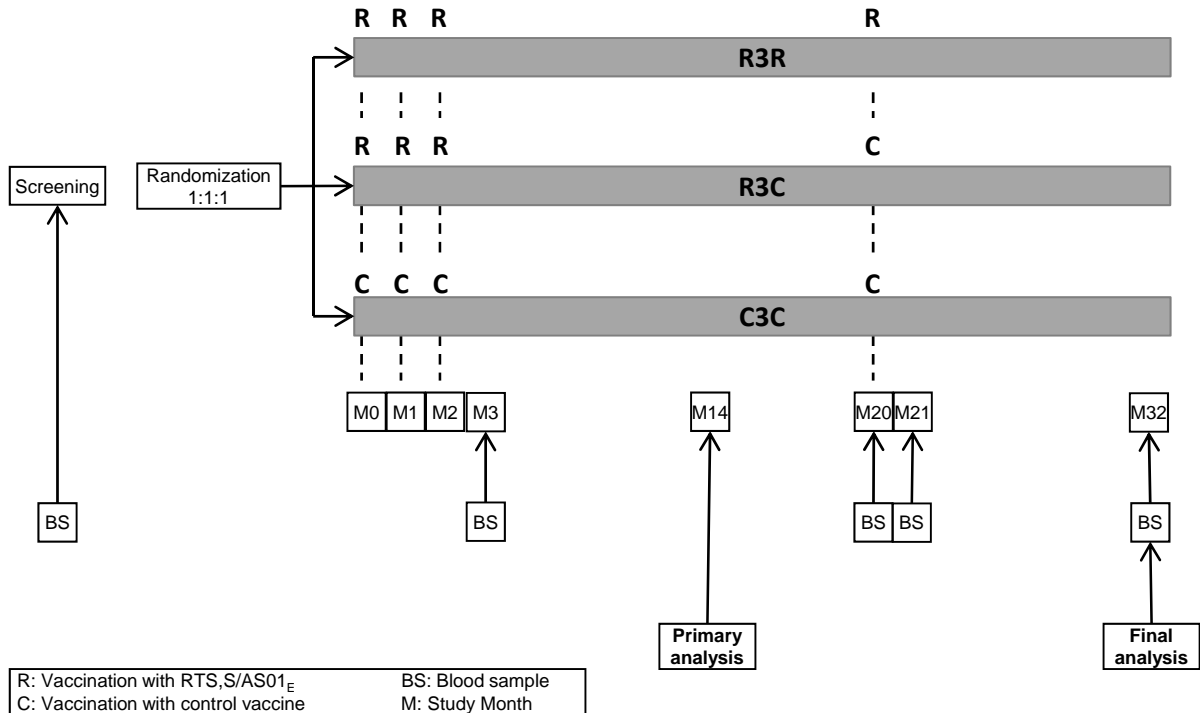

Supplement: MOESM2 [file 9541824]
